# Supplementary material for: Solvent-induced supramolecular isomerism in silver(i) 2-methylimidazolate
Source: Royal Society of Chemistry journal article supplement (doi:10.1039/b602465c), 2006-01-01
Supplement: b602465c.pdf [file b602465c.pdf]

## Solvent-induced supramolecular isomerism in silver(I) 2-methylimidazolate

Xiao-Chun Huang,<sup>\*a b</sup> Dan Li<sup>b</sup> and Xiao-Ming Chen<sup>b\*</sup>

<sup>[a]</sup> Department of Chemistry, Shantou University, Shantou, Guangdong 515063 (China);

<sup>[b]</sup> State Key Laboratory of Optoelectronic Materials and Technologies / School of Chemistry and  
Chemical Engineering, Sun Yat-Sen University, Guangzhou 510275 (China).

\*Corresponding authors. Fax: Int. code +86-754-2510505; E-mail: xchuang@stu.edu.cn (X.-C. Huang)  
and cxm@mail.sysu.edu.cn (X.-M. Chen)

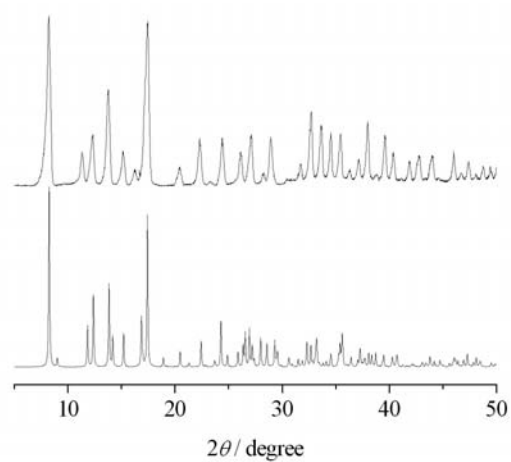

(a)

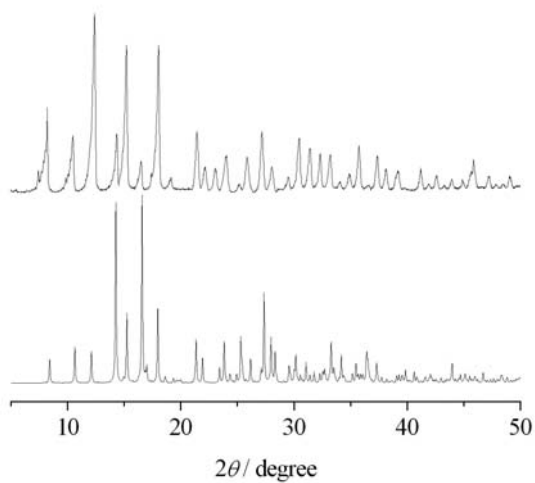

(b)

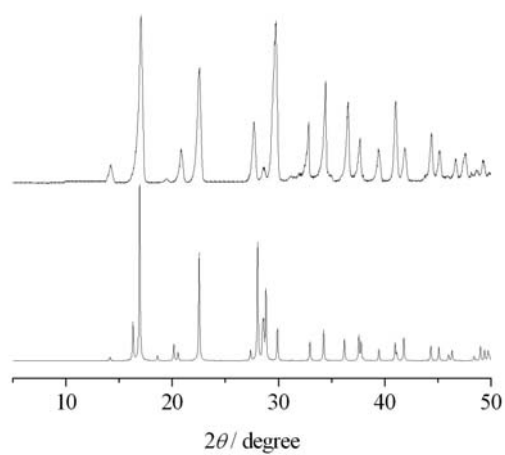

(c)

Fig. S1 XRPD data of **1a** (a), **1b** (b) and **1c** (c) (for each diagram, up: observed pattern; down: simulation pattern).

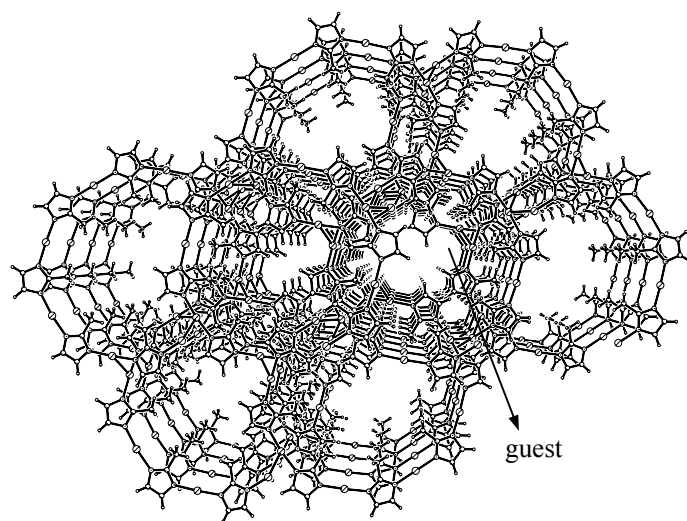

Fig. S2 Crystal packing pattern of **1a** viewed along the *b*-axis.

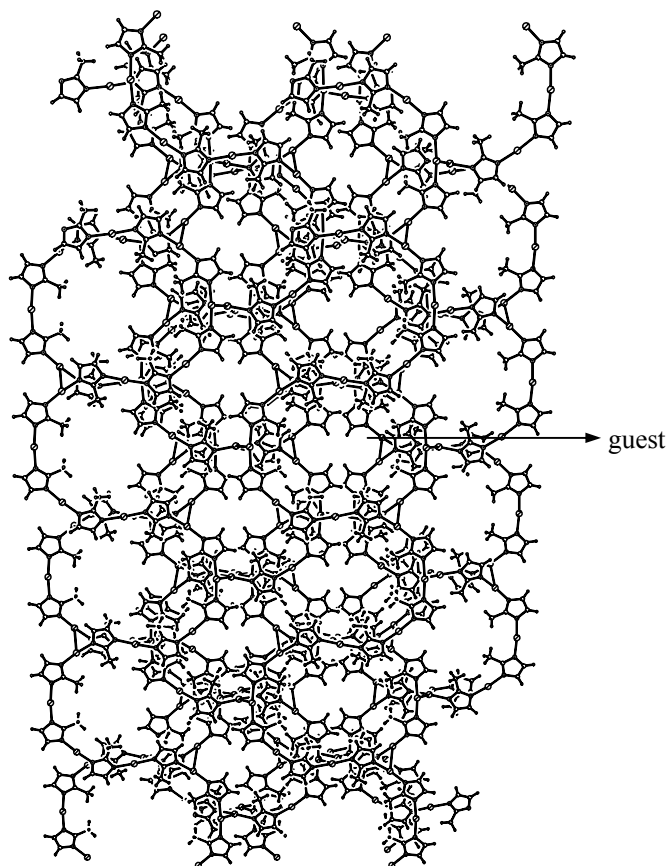

Fig. S3 Crystal packing pattern of **1b** viewed along the *c*-axis.

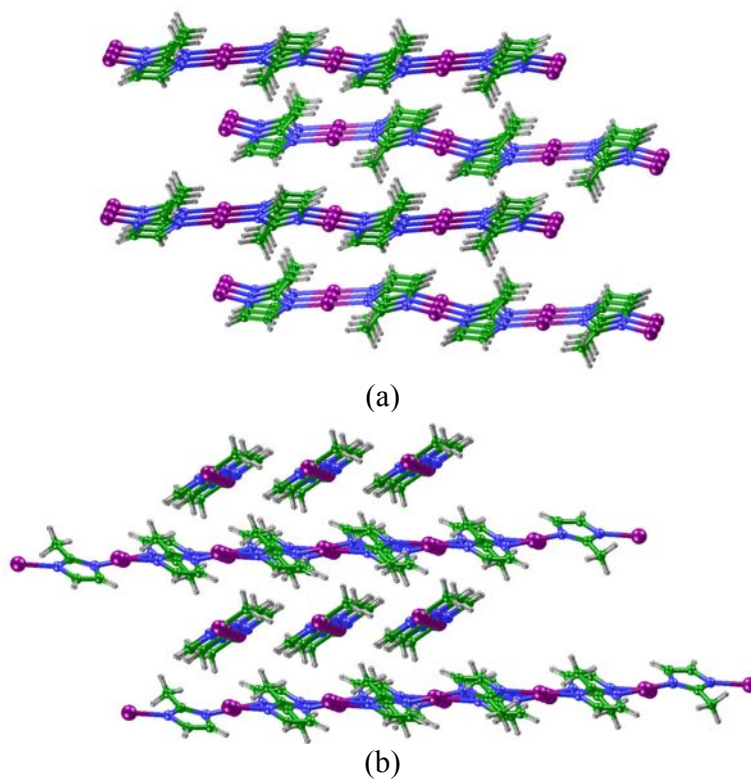

Fig. S4 Crystal packing pattern of **1c** viewed along the *b*-axis (a) and [011] direction (b).
